# Supplementary material
Source: MDPI journal article supplement (https://www.mdpi.com/2072-4292/15/23/5515)
Supplement: s1 [file s1]

**Table S1.** Land cover type classification accuracy.

| Year | OA (%) | MA (%) | UA (%) |
|------|--------|--------|--------|
| 2014 | 93.91  | 91.18  | 91.90  |
| 2015 | 92.53  | 91.97  | 93.92  |
| 2016 | 94.44  | 90.29  | 94.61  |
| 2017 | 93.84  | 95.21  | 89.68  |
| 2018 | 92.61  | 91.98  | 93.99  |
| 2019 | 91.87  | 91.48  | 90.96  |
| 2020 | 92.55  | 88.95  | 95.63  |

**Note:** OA-overall accuracy, MA- mapping accuracy, UA-user accuracy.

**Table S2.** Names and calculation formulas of spectral indexes.

| Index | Index Name                                        | Equation                                                                                           |
|-------|---------------------------------------------------|----------------------------------------------------------------------------------------------------|
| NDVI  | Normalized Difference Vegetation Index            | $(\rho_{NIR} - \rho_R)/(\rho_{NIR} + \rho_R)$                                                      |
| EVI   | Enhanced Vegetation Index                         | $2.5 \times \frac{\rho_{NIR} - \rho_R}{\rho_{NIR} + 6 \times \rho_R - 7.5 \times \rho_{blue} + 1}$ |
| LSWI  | Land Surface Water Index                          | $(\rho_{NIR} - \rho_{SWIR1})/(\rho_{NIR} + \rho_{SWIR1})$                                          |
| MNDWI | Modified Normalized Difference Water Index        | $(\rho_G - \rho_{SWIR})/(\rho_G + \rho_{SWIR})$                                                    |
| NDTI  | Normalized Difference Tillage Index               | $(\rho_{SWIR1} - \rho_{SWIR2})/(\rho_{SWIR1} + \rho_{SWIR2})$                                      |
| NDBI  | Normalized Difference Built-Up Index              | $(\rho_{MIR} - \rho_{NIR})/(\rho_{MIR} + \rho_{NIR})$                                              |
| NDSVI | Normalized Difference Senescence Vegetation Index | $(\rho_{SWIR1} - \rho_R)/(\rho_{SWIR1} + \rho_R)$                                                  |

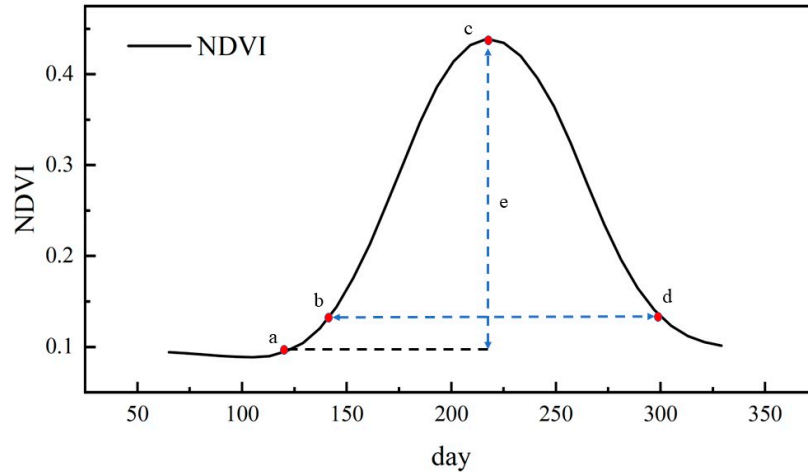**Figure S1.** Phenological parameters of the NDVI curve.

**Note:** a is the minimum NDVI, which is the mean value of the first four time points (March) and the last four time points (November) of the time series; b is the beginning time of the vegetation growing season, which is the date when the minimum NDVI increases to 10 % of the amplitude; c is the maximum value of NDVI, d is the end of the growing season, which is the date corresponding to the 10% amplitude of the lowest point of the NDVI curve. e is NDVI amplitude, which is the difference between the maximum value and the minimum value; the time range between b and d is the duration of the growing season.
